# Supplementary material for: Cyclodextrin polymers as carriers for the platinum-based anticancer agent LA-12
Source: Royal Society of Chemistry journal article supplement (doi:10.1039/c5ra22398a), 2016-01-01
Supplement: c5ra22398a1.pdf [file c5ra22398a1.pdf]

Cyclodextrin polymers as carries for the platinum-based anticancer agent LA-12.

Valentina Giglio,<sup>a</sup> Maurizio Viale,<sup>b</sup> Massimiliano Monticone,<sup>b</sup> Angela M. Aura<sup>a</sup> Giuseppe Spoto,<sup>a</sup>  
Giovanni Natile,<sup>c</sup> Francesco P. Intini,<sup>c</sup> Graziella Vecchio<sup>a,\*</sup>

<sup>a</sup> Dipartimento di Scienze Chimiche, Università di Catania, Viale A. Doria, 6, 95125 Catania (Italy)

<sup>b</sup> IRCCS Azienda Ospedaliera Universitaria San Martino-IST Istituto Nazionale per la Ricerca sul Cancro, U.O.C. Bioterapie, L.go R. Benzi, 10, 16132, Genova (Italy)

<sup>c</sup> Dipartimento di Chimica, Università di Bari, Via E. Orabona, 4, 70125, Bari (Italy)

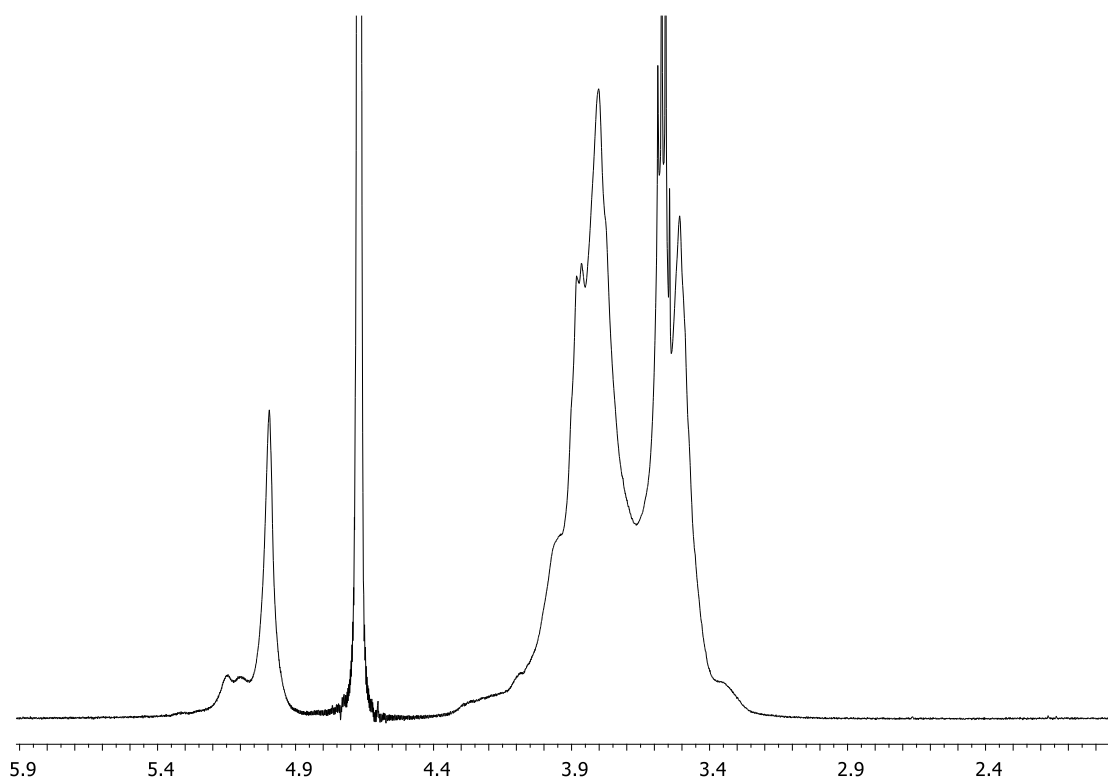

Figure 1S.  $^1\text{H}$  NMR spectrum of oCyD ( $\text{D}_2\text{O}$ , 500 MHz)

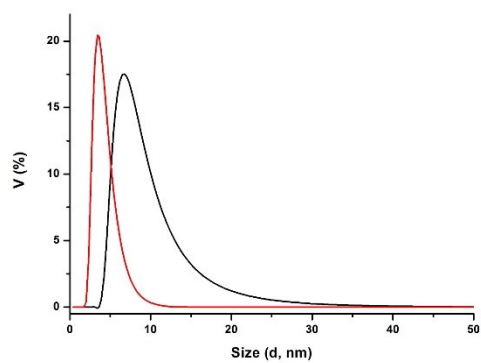

Figure 2S. Volume size distribution of oCyD (red) and pCyD (black) in Tris buffer pH 7.4 at 25°C

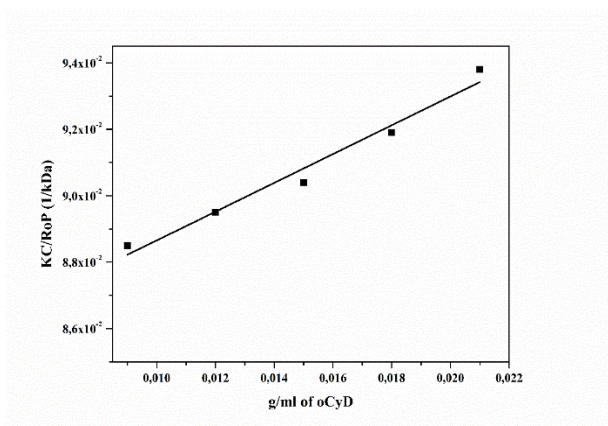

Figure 3S: Intensity of scattered light (Kc/R<sub>0</sub>P<sub>θ</sub>) vs. oCyD concentration.

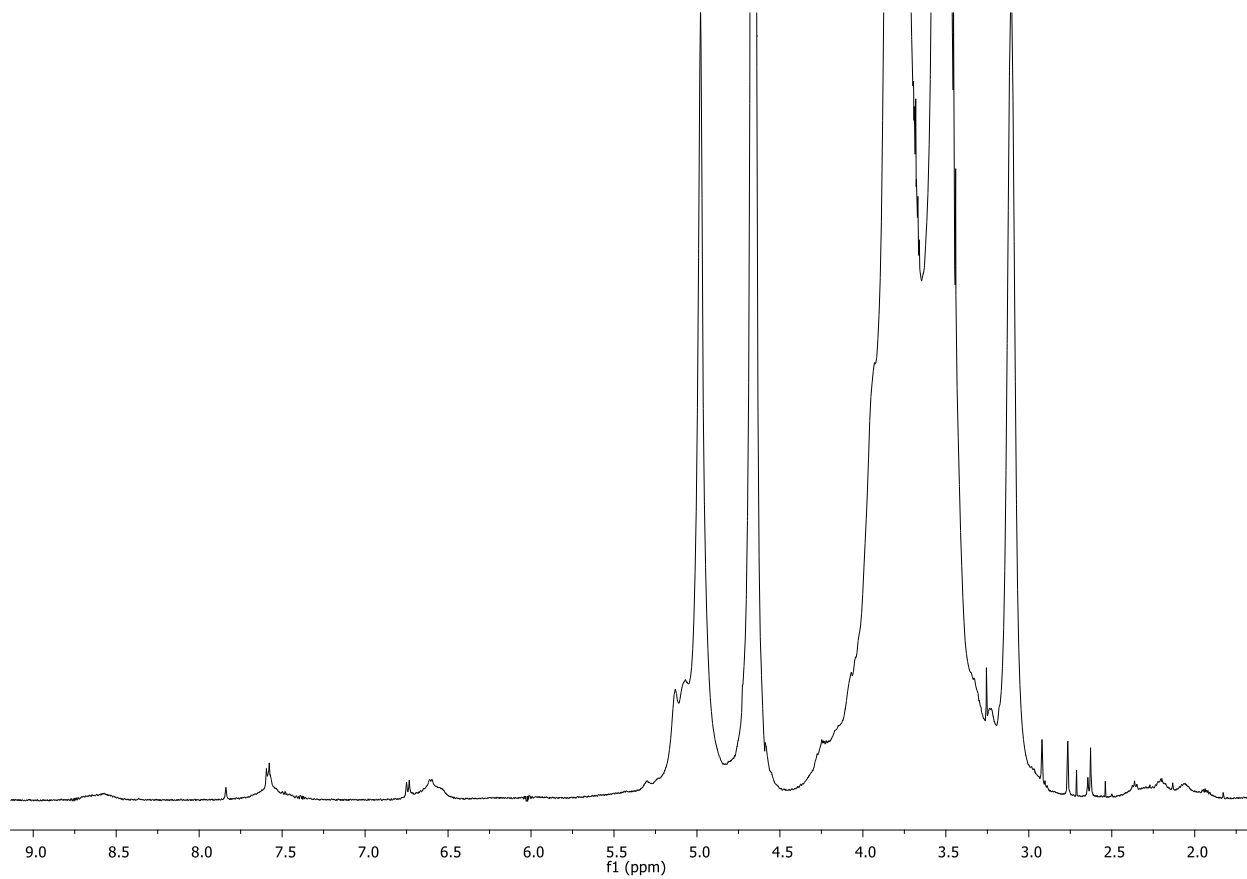

Figure 4S. <sup>1</sup>H NMR spectrum of pCyDFA (D<sub>2</sub>O, 500 MHz)

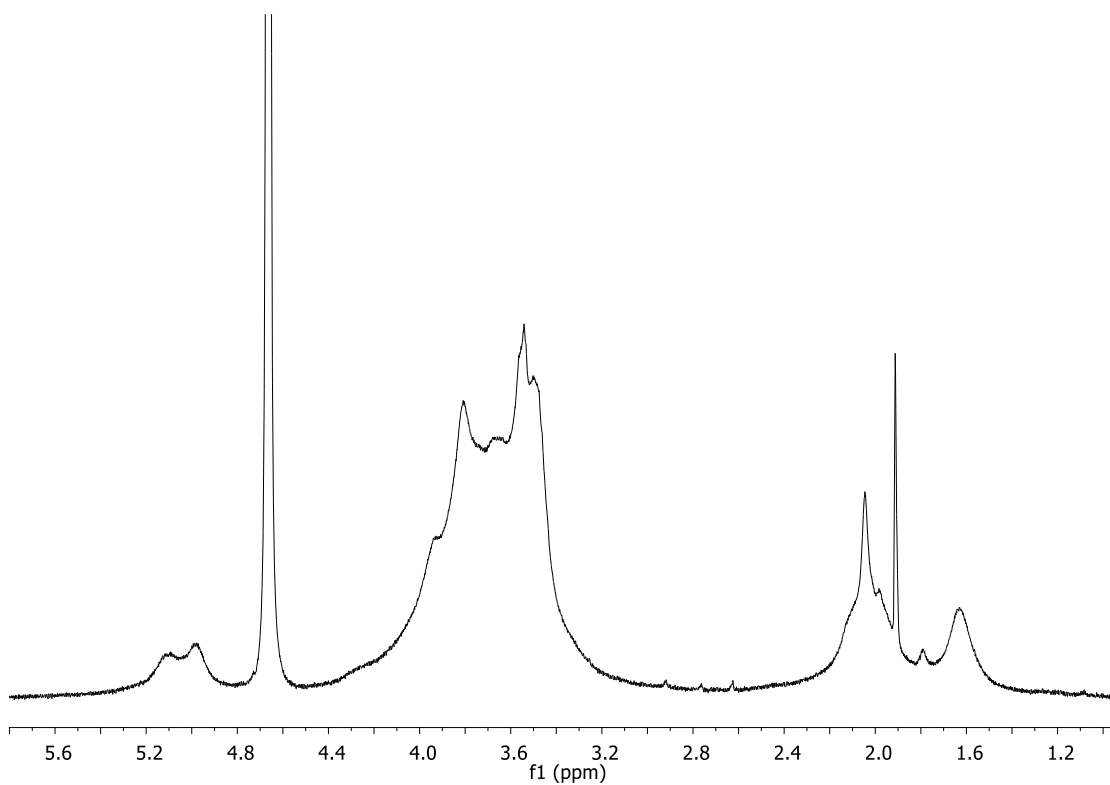

Figure 5S.  $^1\text{H}$  NMR spectrum of pCyDFA/LA-12 ( $\text{D}_2\text{O}$ , 500 MHz, aliphatic region)

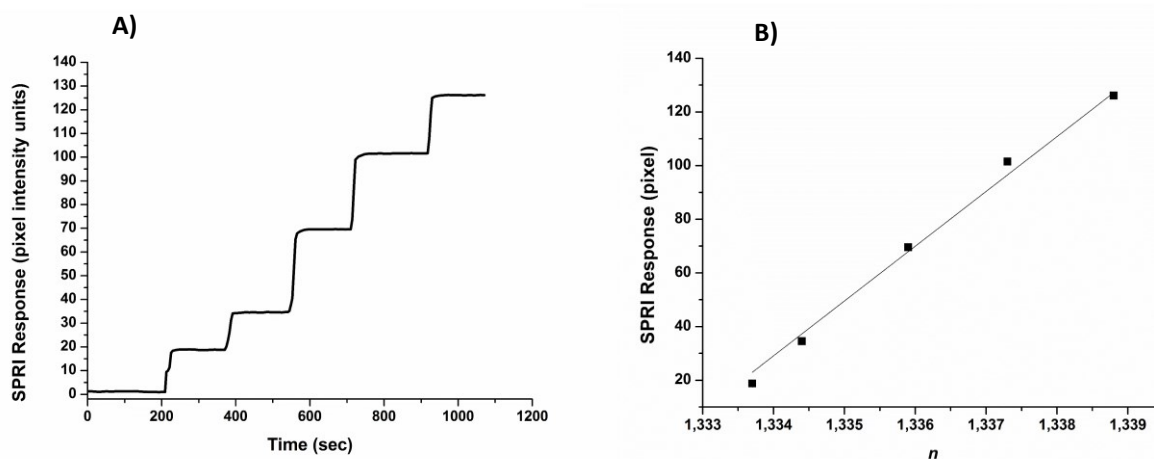

Figure 6S: A) SPRI Response vs time after injecting sucrose solutions (0.0150, 0.0290, 0.0590, 0.0890, 0.1180 M in water); B) SPRI response vs sucrose refractive index.

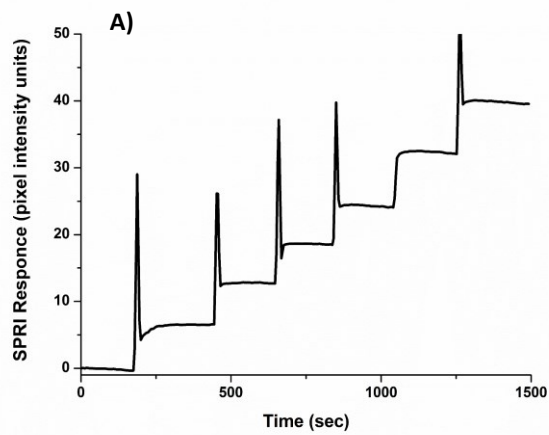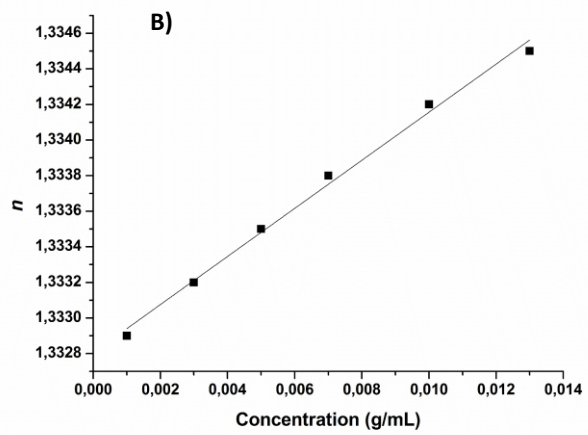

Figure 7S: A) SPRI Response vs time after injecting oCyD solutions (0.001, 0.003, 0.005, 0.007, 0.010, 0.013 g/mL in TRIS buffer 10 mM, pH 7.4), B) Refractive index vs oCyD concentration (0.001, 0.003, 0.005, 0.007, 0.010, 0.013 g/mL in TRIS buffer 10 mM pH 7.4).

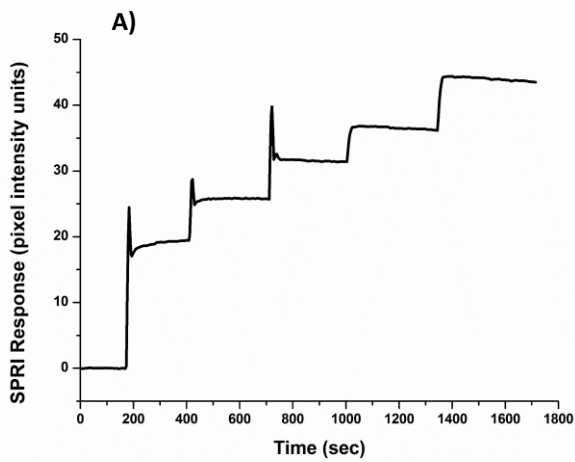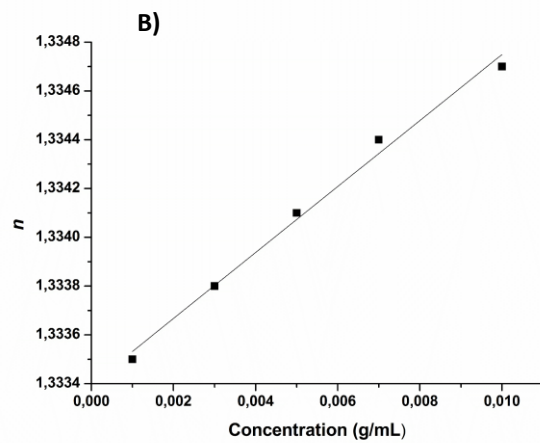

Figure 8S: A) SPRI Response vs time after injecting pCyD solutions (0.001, 0.003, 0.005, 0.007, 0.010 g/mL in TRIS buffer 10 mM pH, 7.4), B) Refractive index vs pCyD concentration (0.001, 0.003, 0.005, 0.007, 0.010 g/mL in TRIS buffer 10 mM pH 7.4).
